# Supplementary material for: Three new luminescent Cd(ii)-MOFs by regulating the tetracarboxylate and auxiliary co-ligands, displaying high sensitivity for Fe3+ in aqueous solution
Source: Royal Society of Chemistry journal article supplement (doi:10.1039/c5dt00492f), 2015-01-01
Supplement: c5dt00492f1.pdf [file c5dt00492f1.pdf]

*Electronic Supplementary Information*

**Three new luminescent Cd(II)-MOFs by regulation of tetracarboxylates and auxiliary co-ligands, displaying high sensitivity for Fe<sup>3+</sup> in aqueous solution†**

**Yunlong Wu, Guo-Ping Yang\*, Xiang Zhou, Jiang Li, Yan Ning, and Yao-Yu Wang\***

*Key Laboratory of Synthetic and Natural Functional Molecule Chemistry of Ministry of Education, Shaanxi Key Laboratory of Physico-Inorganic Chemistry, College of Chemistry and Materials Science, Northwest University, Xi'an 710069, P.R. China. E-mail: [ygp@nwu.edu.cn](mailto:ygp@nwu.edu.cn), [wyaoyu@nwu.edu.cn](mailto:wyaoyu@nwu.edu.cn).*

**Table S1.** Selected bond lengths [ $\text{\AA}$ ] and angles [ $^\circ$ ] for three MOFs.

| Complex 1                                                                    |            |                      |            |
|------------------------------------------------------------------------------|------------|----------------------|------------|
| Cd(1)-O(4)#1                                                                 | 2.249(3)   | O(3)#2-Cd(1)-N(2)#3  | 84.48(12)  |
| Cd(1)-N(1)                                                                   | 2.289(3)   | O(4)#1-Cd(1)-O(1)    | 93.39(11)  |
| Cd(1)-O(3)#2                                                                 | 2.325(3)   | N(1)-Cd(1)-O(1)      | 97.87(12)  |
| Cd(1)-N(2)#3                                                                 | 2.325(3)   | O(3)#2-Cd(1)-O(1)    | 152.64(12) |
| Cd(1)-O(1)                                                                   | 2.408(3)   | N(2)#3-Cd(1)-O(1)    | 86.41(12)  |
| Cd(1)-O(2)                                                                   | 2.420(3)   | O(4)#1-Cd(1)-O(2)    | 146.76(11) |
| O(4)#1-Cd(1)-N(1)                                                            | 103.67(12) | N(1)-Cd(1)-O(2)      | 89.51(12)  |
| O(4)#1-Cd(1)-O(3)#2                                                          | 111.39(13) | O(3)#2-Cd(1)-O(2)    | 99.35(12)  |
| N(1)-Cd(1)-O(3)#2                                                            | 87.66(12)  | N(2)#3-Cd(1)-O(2)    | 85.65(12)  |
| O(4)#1-Cd(1)-N(2)#3                                                          | 85.03(12)  | O(1)-Cd(1)-O(2)      | 54.19(10)  |
| N(1)-Cd(1)-N(2)#3                                                            | 169.98(13) |                      |            |
| Symmetry codes: #1: -x+1, -y+1, -z+2; #2: x-1, y, z; #3: x+1, -y+1/2, z+1/2. |            |                      |            |
| Complex 2                                                                    |            |                      |            |
| Cd(1)-O(1)                                                                   | 2.291(2)   | O(3)#1-Cd(1)-O(4)#1  | 55.71(8)   |
| Cd(1)-N(2)                                                                   | 2.300(3)   | N(1)-Cd(1)-O(4)#1    | 111.45(10) |
| Cd(1)-O(3)#1                                                                 | 2.315(3)   | O(1)-Cd(1)-O(2)      | 55.89(7)   |
| Cd(1)-N(1)                                                                   | 2.330(3)   | N(2)-Cd(1)-O(2)      | 94.45(10)  |
| Cd(1)-O(4)#1                                                                 | 2.386(2)   | O(3)#1-Cd(1)-O(2)    | 118.95(9)  |
| Cd(1)-O(2)                                                                   | 2.397(2)   | N(1)-Cd(1)-O(2)      | 143.54(8)  |
| O(1)-Cd(1)-N(2)                                                              | 101.88(11) | O(4)#1-Cd(1)-O(2)    | 102.90(8)  |
| O(1)-Cd(1)-O(3)#1                                                            | 117.23(9)  | O(1)-Cd(1)-C(11)#1   | 140.91(10) |
| N(2)-Cd(1)-O(3)#1                                                            | 138.16(10) | N(2)-Cd(1)-C(11)#1   | 117.10(10) |
| O(1)-Cd(1)-N(1)                                                              | 93.35(9)   | O(3)#1-Cd(1)-C(11)#1 | 27.94(9)   |
| N(2)-Cd(1)-N(1)                                                              | 71.35(10)  | N(1)-Cd(1)-C(11)#1   | 101.34(9)  |
| O(3)#1-Cd(1)-N(1)                                                            | 91.17(10)  | O(4)#1-Cd(1)-C(11)#1 | 27.84(8)   |
| O(1)-Cd(1)-O(4)#1                                                            | 153.57(9)  | O(2)-Cd(1)-C(11)#1   | 114.89(8)  |
| N(2)-Cd(1)-O(4)#1                                                            | 94.86(10)  |                      |            |
| Symmetry code: #1: x, -y+1/2, z+1/2.                                         |            |                      |            |

### Complex 3

|                     |            |                   |            |
|---------------------|------------|-------------------|------------|
| Cd(1)-O(1)          | 2.454(3)   | N(1)-Cd(1)-O(1)   | 105.96(13) |
| Cd(1)-O(2)          | 2.283(3)   | O(2)-Cd(1)-N(2)   | 121.70(13) |
| Cd(1)-O(4)#4        | 2.280(3)   | O(4)#5-Cd(1)-N(2) | 97.76(12)  |
| Cd(1)-N(1)          | 2.339(4)   | O(4)#4-Cd(1)-N(1) | 166.82(12) |
| Cd(1)-N(2)          | 2.292(3)   | O(2)-Cd(1)-N(1)   | 98.21(13)  |
| Cd(1)-O(4)#5        | 2.289(3)   | O(4)#5-Cd(1)-N(1) | 102.43(12) |
| O(4)-Cd(1)#2        | 2.289(3)   | N(2)-Cd(1)-N(1)   | 71.30(13)  |
| O(4)-Cd(1)#1        | 2.280(3)   | O(4)#4-Cd(1)-O(1) | 87.16(11)  |
| O(4)#4-Cd(1)-O(2)   | 90.43(11)  | O(2)-Cd(1)-O(1)   | 54.43(11)  |
| O(4)#4-Cd(1)-O(4)#5 | 76.63(11)  | O(4)#5-Cd(1)-O(1) | 86.50(11)  |
| O(4)#4-Cd(1)-N(2)   | 95.70(12)  | N(2)-Cd(1)-O(1)   | 175.32(13) |
| O(2)-Cd(1)-O(4)#5   | 139.67(11) |                   |            |

Symmetry codes: #1 : x, -y, z+1/2 ; #2 : -x+3/2, y-1/2, -z+3/2 ; #4 : x, -y, z-1/2 ; #5 : -x+3/2, y+1/2, -z+3/2.

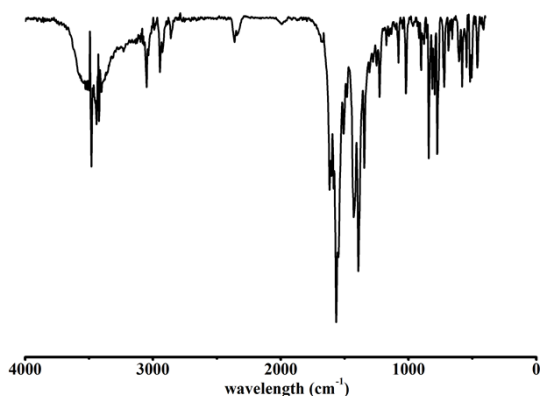

(a)

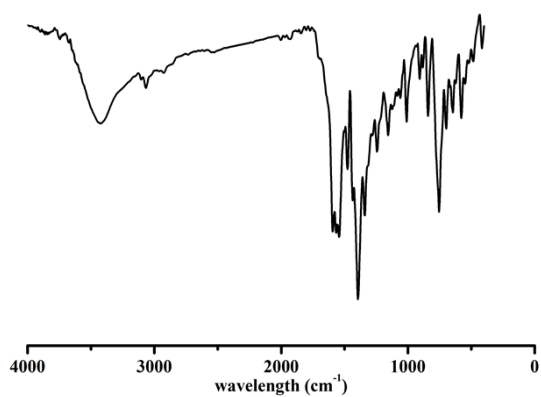

(b)

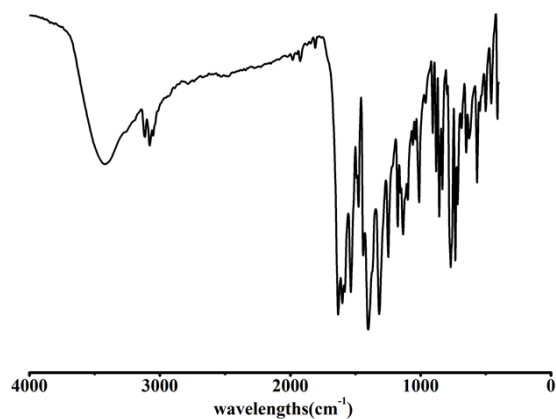

(c)

**Fig. S1** The FT-IR spectra of complexes **1** (a), **2** (b), and **3** (c).

**Table S2.** The FT-IR vibrational modes of the functional groups in three MOFs

|          |                                               |                                                                                                                                                                              |                                                |
|----------|-----------------------------------------------|------------------------------------------------------------------------------------------------------------------------------------------------------------------------------|------------------------------------------------|
| <b>1</b> | $\nu_{\text{O-Cd}} \sim 3488 \text{ cm}^{-1}$ | $\nu^{\text{as}}_{(\text{COO}^-)} \sim 1577 \text{ cm}^{-1}$ , $\nu^{\text{s}}_{(\text{COO}^-)} \sim 1390 \text{ cm}^{-1}$                                                   | $\omega_{\text{C-H}} \sim 848 \text{ cm}^{-1}$ |
| <b>2</b> | $\nu_{\text{O-Cd}} \sim 3415 \text{ cm}^{-1}$ | $\nu^{\text{as}}_{(\text{COO}^-)} \sim 1580 \text{ cm}^{-1}$ , $\nu^{\text{s}}_{(\text{COO}^-)} \sim 1382 \text{ cm}^{-1}$                                                   | $\omega_{\text{C-H}} \sim 760 \text{ cm}^{-1}$ |
| <b>3</b> | $\nu_{\text{O-Cd}} \sim 3423 \text{ cm}^{-1}$ | $\nu_{\text{C=O}} \sim 1645 \text{ cm}^{-1}$ ; $\nu^{\text{as}}_{(\text{COO}^-)} \sim 1405 \text{ cm}^{-1}$ ,<br>$\nu^{\text{s}}_{(\text{COO}^-)} \sim 1325 \text{ cm}^{-1}$ | $\omega_{\text{C-H}} \sim 759 \text{ cm}^{-1}$ |

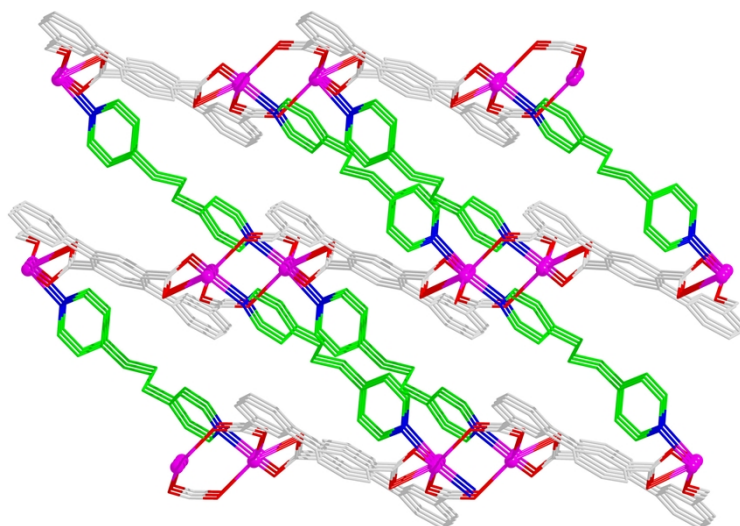

**Fig. S2** The 3D framework of **1** viewed along *b* axis.

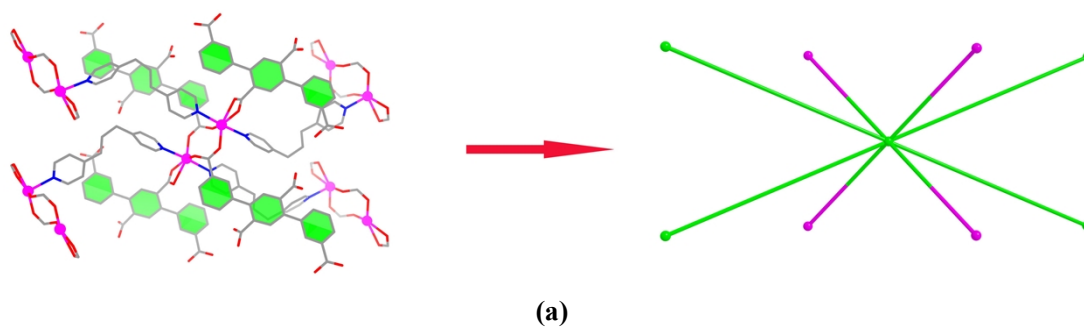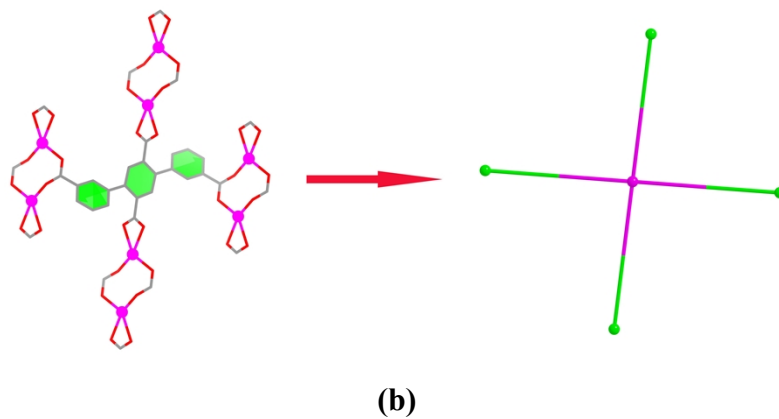

**Fig. S3** The dimeric  $[\text{Cd}_2(\text{COO})_4]$  SBU unit is simplified as eight-connected node (a), and  $\text{L}_1^{4-}$  ligand is acted as four-connected nodes (b).

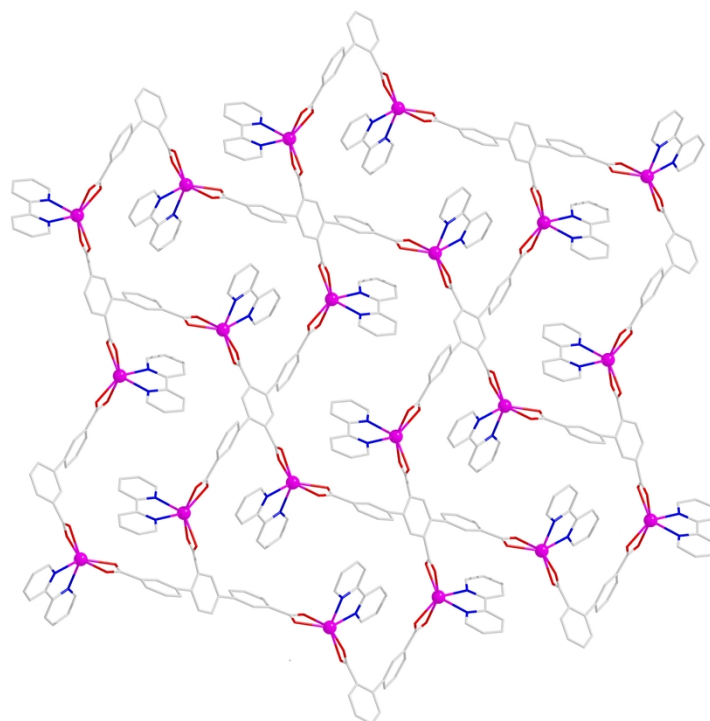

**Fig. S4** The 2D grid-like layer of **2**.

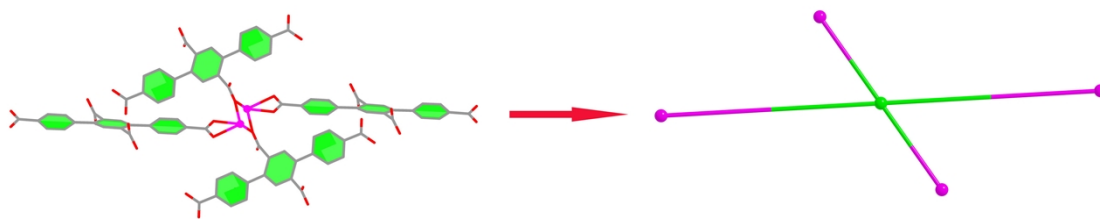

(a)

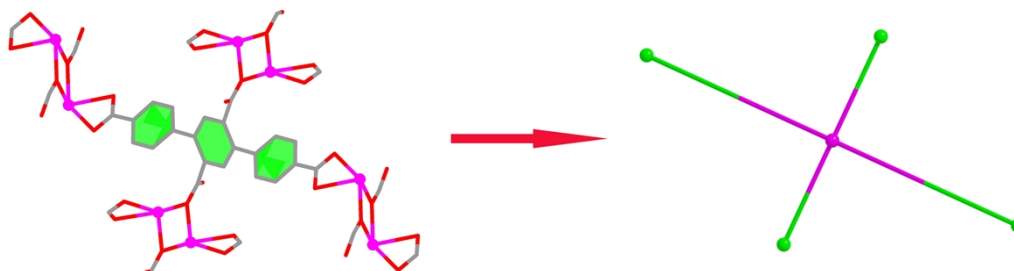

(b)

**Fig. S5** The dimeric  $[\text{Cd}_2(\text{COO})_4]$  motif is considered as four-connected node (a), and  $\text{L}_2^4$  ligand is acted as four-connected nodes (b).

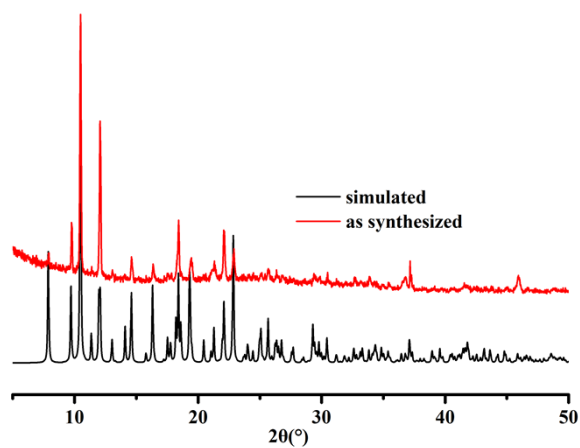

(a)

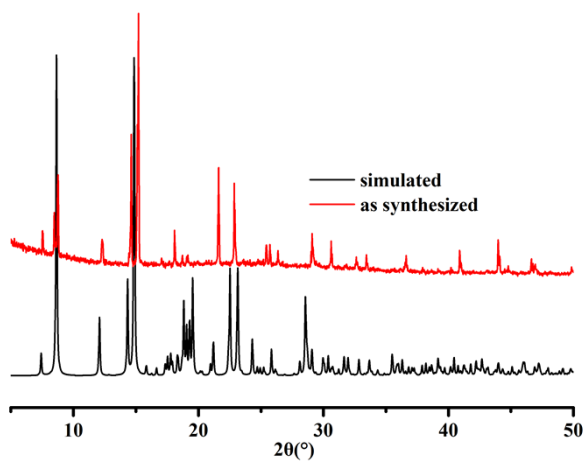

(b)

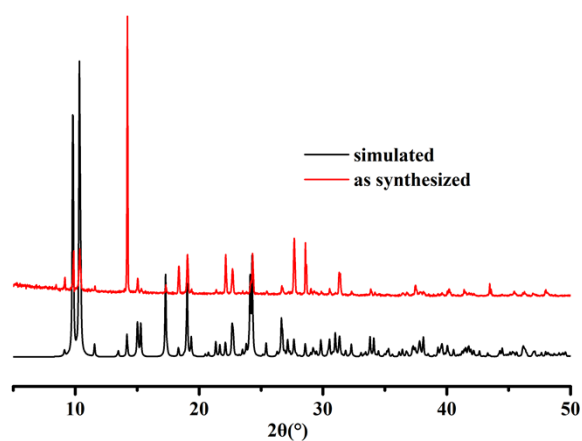

(c)

**Fig. S6** PXRD patterns of complexes **1** (a), **2** (b), and **3** (c) simulated from the X-ray single crystal structures and as-synthesized products.

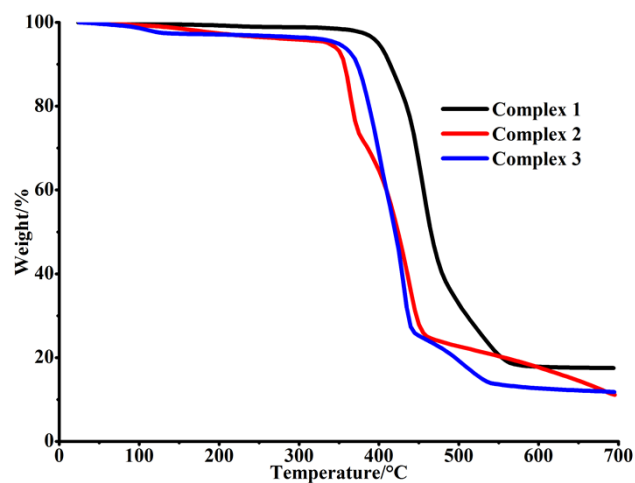

**Fig. S7** TGA curves for three complexes.

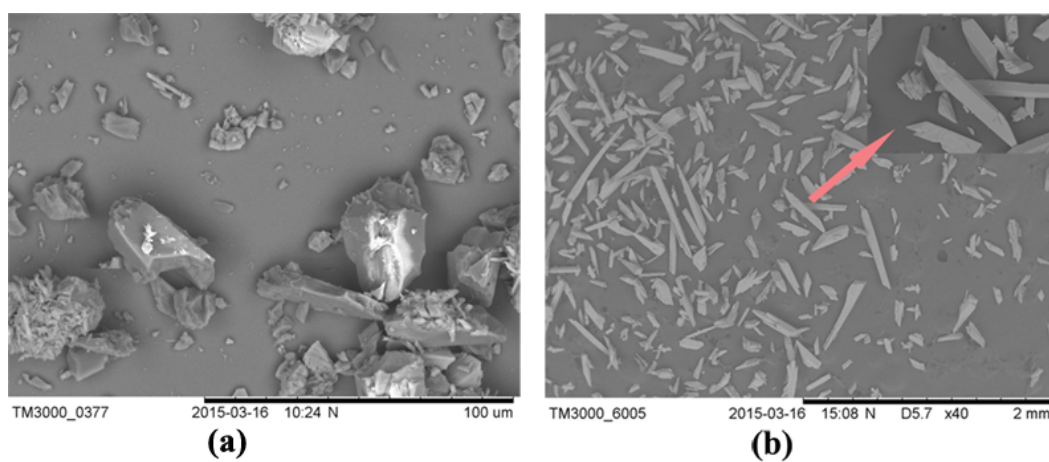

**Fig. S8** The SEM images of grinded sample of **3** (a) and the original shape of **3** (b).

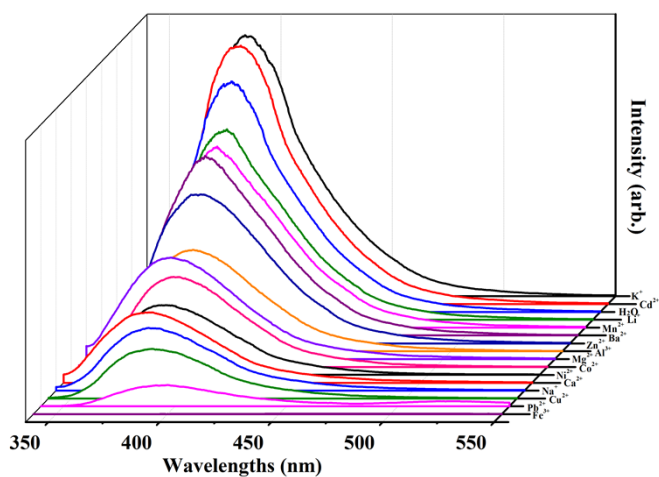

**Fig. S9** Emission spectra of **3** with different metal ions.

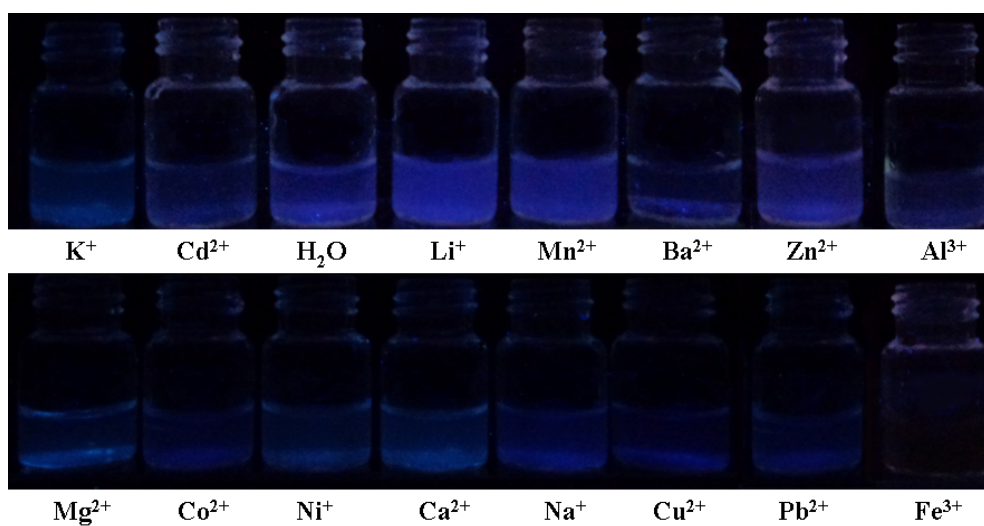

**Fig. 10** Color change in aqueous solution containing different metal ions.

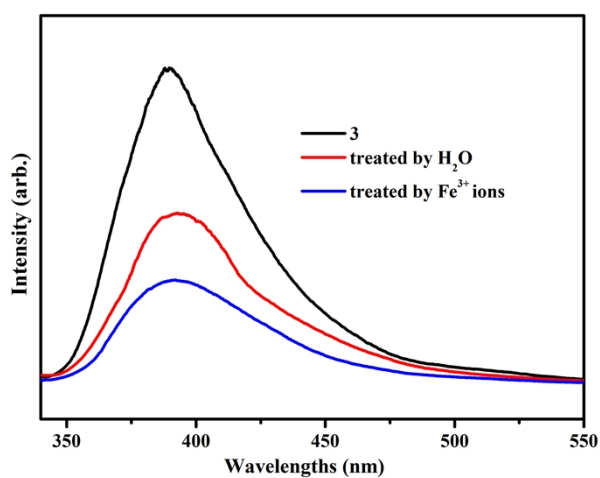

**(a)**



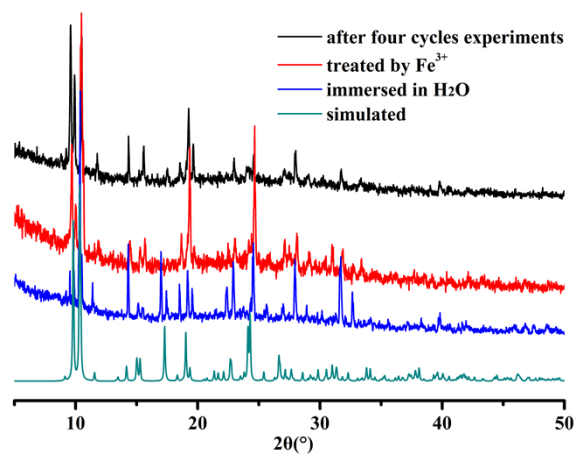

(b)

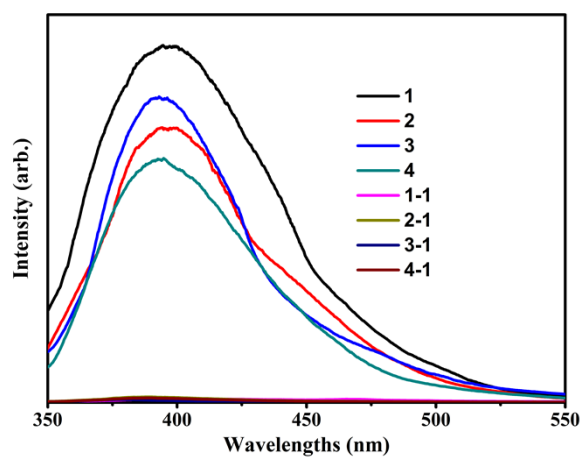

(c)

**Fig. S11** The first cyclic emission spectra (a), PXRD patterns (b), and last four cyclic emission spectra of the sensing experiments of **3** (c).
